# Supplementary material for: Wavelength-resolved quantum yields for vanillin photochemistry: self-reaction and ionic-strength implications for wildfire brown carbon lifetime
Source: Royal Society of Chemistry journal article supplement (doi:10.1039/d4ea00002a), 2024-01-01
Supplement: d4ea00002a1.pdf [file d4ea00002a1.pdf]

# Wavelength-resolved quantum yields for Vanillin Photochemistry: Self-Reaction and Ionic-Strength Implications for Atmospheric Brown Carbon Lifetime

Greg T. Drozd, Tate Weltzin, Sam Skiffington, Dong Lee, Rashid Valiev, Theo Kurtén, Lindsey R. Madison, Yiheng He, Lydia Gargano

## Supplemental Information

### Supplemental Figures



Figure S1.  $I_{0,sun}(\lambda)$  for  $0$  and  $60^\circ$  SZA, blue and yellow respectively, normalized to the solar intensity at  $400\text{nm}$  for that SZA,  $I_{0,sun}(400\text{nm})$ . The green line shows the ratio of the normalized  $I_{0,sun}(\lambda)$  at  $60^\circ$  SZA to that of  $0^\circ$  SZA, showing for example that  $I_{0,60^\circ\text{ SZA}}(311\text{nm})/I_{0,60^\circ\text{ SZA}}(400)$  has a value that is  $1/2$  that of the ratio  $I_{0,0^\circ\text{ SZA}}(311\text{nm})/I_{0,0^\circ\text{ SZA}}(400)$ . Solar intensity data obtained from the NCAR TUV Model.



Figure S2. Representative second order fits for photochemical loss of vanillin. All experiments shown are for  $310\text{ nm}$  excitation in aqueous solution with  $\text{pH} = 2$ .



Figure S3. Decomposition of the vanillin UV spectrum (base-e, black) into separate states approximated by Gaussian spectral profiles (S2, blue and S3, red) and the sum of the individual spectra (green). The centers of the individual bands are at 277 nm and 311 nm.



Figure S4. Representative chromatograms for irradiation of 25  $\mu\text{M}$  vanillin at  $\sim 50\%$  loss. Top : UV absorbance at 310 nm. Bottom : signal for  $M + H^+$  for vanillin ( $t_R = 1.5$  min,  $m/z$  153) and the dimer product ( $t_R = 1.9$  min,  $m/z$  303)



Figure S5. UV Spectra during several time points during the irradiation of 5  $\mu\text{M}$  vanillin with a 310 nm LED. Isosbestic points are present at 355nm and 252nm, indicating predominance of a single product with significant UV absorbance.



Figure S6.  $\Phi_{\text{loss}}$  as function of initial  $[\text{Van}]$  with 310 nm irradiation at pH = 2 with de-oxygenated solution (red) and air-saturated solution (blue).



Figure S7. The Jablonski diagram for vanillin in water, at the S<sub>2</sub> equilibrium geometry. Note that after vibrational relaxation, S<sub>2</sub> becomes the lowest energy excited state at its equilibrium geometry. The  $k_r$  are radiative rate constants,  $k_{ISC}$  are intersystem crossing rate constants and  $k_{IC}$  are internal conversion rate constants.

## Supplemental Tables

**Table S1.** The computed wavelengths in nm of electronic transitions and oscillator strengths ( $f$ ) in parenthesis for vanillin+h<sub>2</sub>O using PCM/TDDFT/B3LYP/6-31G\*\* in the S<sub>0</sub> and S<sub>2</sub> geometries. The electronic natures of transitions are given as well.

| S <sub>0</sub> geometry        |                     |
|--------------------------------|---------------------|
| Transition                     | Wavelength ( $f$ )  |
| S <sub>0</sub> →S <sub>1</sub> | 308 (0.0003) n→π*   |
| S <sub>0</sub> →S <sub>2</sub> | 304 (0.17) π→π*     |
| S <sub>0</sub> →S <sub>3</sub> | 268 (0.22) π→π*     |
| S <sub>2</sub> geometry        |                     |
| S <sub>0</sub> →S <sub>2</sub> | 360.25 (0.22) π→π*  |
| S <sub>0</sub> →S <sub>1</sub> | 324.36(0.0004) n→π* |
| S <sub>0</sub> →S <sub>3</sub> | 285.8(0.33) π→π*    |

**Table S2.** Ratio of the lifetimes for photochemical loss of vanillin assuming a single, given SZA and at specific latitudes on the dates of the solstice and equinox. The lifetimes have been multiplied by the ratio of solar intensities to remove the dependence on photon flux and emphasize the dependence on the variation on the solar spectrum rather than its intensity. Values

$$\frac{\tau_{min,lat}}{\tau_{SZA}}$$

in parentheses are  $\tau_{SZA}$  and do not account for the difference in the peak solar flux at a given latitude and the chosen/reported SZA.

| $\frac{\tau_{min,lat}}{\tau_{SZA}} * \frac{I_{solar,max,lat}}{I_{solar,SZA}}$ | SZA = 0°  |           | SZA = 45° |           | SZA = 60° |           |
|-------------------------------------------------------------------------------|-----------|-----------|-----------|-----------|-----------|-----------|
|                                                                               | 15°N      | 45°N      | 15°N      | 45°N      | 15°N      | 45°N      |
| Summer Solstice                                                               | 1.0 (1.0) | 1.0 (1.1) | 0.9 (0.6) | 0.9 (0.7) | 0.8 (0.4) | 0.8 (0.4) |
| Equinox (Fall/Spr)                                                            | 1.0 (1.2) | 1.1 (1.6) | 0.9 (0.8) | 1.0 (1.0) | 0.8 (0.4) | 0.9 (0.6) |
| Winter Solstice                                                               | 1.1 (2.1) | 1.5 (4.8) | 1.0 (1.3) | 1.3 (3.0) | 0.8 (0.8) | 1.2 (1.7) |

## Supplemental Text

### S1. Excited State Dynamic Calculations

Within the Franck-Condon approximation, and using linear coupled model (the Hessians of initial ( $S_i$ ) and final electronic ( $T_j$ ) states are assumed to be equal), the  $k_{ISC-TD}(S_i \rightarrow T_j)$  rate can be calculated as [14]

$$k_{ISC-TD}(S_i \rightarrow T_j) = \frac{\langle \Psi(S_i) | \hat{H}_{SO} | \Psi(T_j) \rangle^2}{\hbar^2} \int_{-\infty}^{\infty} e^{\Phi(t)} dt \quad (S1)$$

Here,  $\Phi(t) = \frac{i}{\hbar} \Delta E t + y_\mu (e^{i\omega_\mu t} - 1) + 2y_\mu m_\mu (1 - \cos(\omega_\mu t))$  and  $m_\mu = \frac{1}{1 - e^{-\frac{\hbar\omega}{kT}}}$  is the Boltzmann population of the  $\mu$ -th mode vibrational level with frequency  $\omega_\mu$ . The  $y_\mu$  is the Huang-Rhys factor related to the equilibrium position displacement of the  $\mu$ -th mode during the  $S_i \rightarrow T_j$  transition, with an adiabatic energy gap  $\Delta E$ . The integral (X1) is calculated using the saddle point method [14]:

$$k_{ISC-TD}(S_i \rightarrow T_j) = \sqrt{\frac{2\pi}{|\Phi''(\tau_T)|}} \cdot e^{\Phi(\tau_T)} \frac{\langle \Psi(S_i) | \hat{H}_{SO} | \Psi(T_j) \rangle^2}{\hbar^2} \quad (S2)$$

Here, the second derivative of  $\Phi(t)$  is

$$\Phi''(t) = -y_\mu \omega_\mu^2 (e^{i\omega_\mu t} + 2m_\mu \cos(\omega_\mu t)) \quad (S3).$$

The first saddle point ( $\tau_T$ ) can be found by solving following expression [14]:

$$\hbar\omega_\mu y_\mu (e^{i\omega_\mu \tau_T} + 2m_\mu \cos(\omega_\mu \tau_T)) = \Delta E \quad (S4).$$

The  $\tau_T$  and finally  $k_{ISC-TD}(S_i \rightarrow T_j)$  depend on the effective temperature (T). T can be connected to the occupancies of vibrational levels, and finally to the vibrational energy of the  $S_i$  state [14].

### S2. Screening Effects

Due to absorption by the sample, the solution closer to the illumination source (at the bottom of the quartz vial) will receive a larger photon flux than the solution further from the illumination

source (at the top of the liquid level). In effect, the photochemical reaction necessarily proceeds faster in the solution at the bottom of the vial than the solution at the top of the vial. To account for this, the light absorption weighted internal screening factor, S, is calculated. S is the ratio of the actual fraction of light absorbed compared to the fraction of light absorbed under optically thin conditions. All calculated quantum yields are divided by S, to account for an artificially slower volume-averaged reaction rate in solutions that are optically thicker (e.g. larger volume or higher concentration).

$$S = \frac{\sum (1 - 10^{-\varepsilon * l * [Van]})}{\sum 2.303 * \varepsilon * l * [Van]} \quad (6)$$

### S3. Effects of Oxygenation Levels

The values of  $k_{SR}$  and  $\Phi_1$  can be estimated for both air-saturated and de-oxygenated conditions. The fundamental processes described by these rate constants are not different in air-saturated or deoxygenated conditions, yet secondary chemistry in the presence of oxygen complicates the direct relation between the two cases. Differences in  $k_{SR}$  and  $\Phi_1$  values with varying  $[O_2]$  will indicate the importance of quenching, regeneration of vanillin, and production of secondary radical species. With an upper limit of  $[O_2] = 30 \mu M$  in our deoxygenated experiments,  $k_1 = 1.56 * 10^5 s^{-1}$ . Under deoxygenated conditions,  $\Phi_{Loss}$  are much higher in the presence of oxygen within the measured concentration range, as expected in the absence of this bimolecular quenching process.
